# Supplementary material
Source: Springer Nature journal article supplement (https://www.springermedizin.de/resource/supplementary/12937_2009_257_MOESM3_ESM.pdf/25654742)

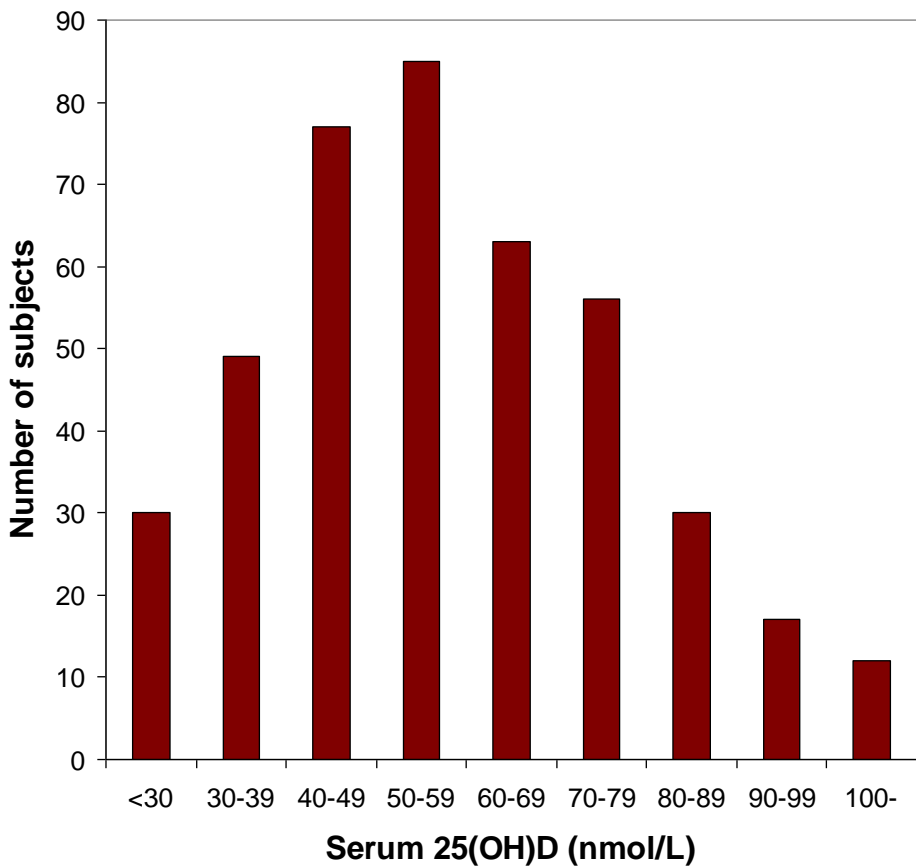

Supplement: MOESM3 [file 25654742]
